# Supplementary material for: Dynamics of Reactive Oxygen Species on Cobalt-Containing Spinel Oxides in Cyclic CO Oxidation
Source: MDPI journal article supplement (doi:10.3390/catal11111312), 2021-10-29
Supplement: s1 [file s1]

Archive with 1 entries (1 files):
- catalysts-1422192-supplementary.pdf
